# Supplementary material for: Knowledge, attitude, and practices with respect to disease surveillance among urban private practitioners in Pune, India
Source: PubMed Central journal article supplement (PMC4592845; doi:10.3402/gha.v8.28413), 2015-10-01
Supplement: GHA-8-28413-s001.pdf [file GHA-8-28413-s001.pdf]

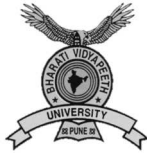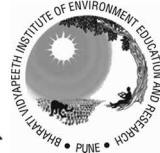

## Urban Disease Surveillance

### Role of Private Health Care Providers in Pune

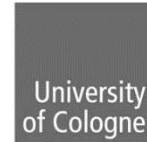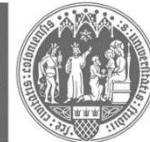

## Consent Form

### Purpose

The main objective of the project on urban disease surveillance in Pune is to develop and implement a prototype urban disease surveillance system which addresses the gaps identified in existing surveillance systems in Maharashtra notably weak private sector integration and exclusion of non-communicable diseases from routine surveillance. The aim is to design a generic “blueprint” which can then be extrapolated to other cities. The system will be designed in a way that it does not duplicate existing programmes but rather supplements them.

A **pilot test** will be conducted for 12 months, beginning from November 2013, within selected health care facilities in three areas in Pune (Kasba Peth, Dhankawadi and Lavale). The pilot test will help to gain important insights into routine disease surveillance. It will also provide information about opportunities and barriers for the integration of private health care facilities into routine data collection. The data analysis and the process evaluation of the pilot will help to generate recommendations on 1) how the design of the health monitoring system can be extrapolated to Pune city and 2) how components of the design could be integrated into existing surveillance structures.

This research is supervised by Prof. Dr. Erach Bharucha, Bharati Vidyapeeth University (020-24375684), and Prof. Dr. Frauke Kraas, University of Cologne, Germany (0049-221-4707050).

### Voluntary Participation and Confidentiality

You have been selected as a private practitioner in one of three research areas to be part of this survey. You will be asked some questions about your clinic and your opinion regarding disease surveillance. The interview will last approximately 15 minutes.

Your participation is voluntary and you can withdraw from the survey at any point after having agreed to participate. You are free to refuse to answer any question. The information you provide is confidential and will only be used for research purposes. If I have your oral consent can I begin the interview?

Agreed: <sub>1</sub> yes <sub>2</sub> no; if no please state reason: \_\_\_\_\_

<sub>3</sub> agreed to fill out form manually (if appointment not possible)

Date Visit 1: \_\_/\_\_/2013 (facility closed/no time)

Date Visit 2: \_\_/\_\_/2013 (facility closed during opening hours/no time)

Date Visit 3: \_\_/\_\_/2013 (facility closed during opening hours/no time)

Facility ID: \_\_/\_\_/\_\_

Investigator: \_\_\_\_\_

### Respondent:

Name: \_\_\_\_\_

Duration of practice (years): \_\_\_\_\_

Gender: <sub>1</sub> male <sub>2</sub> female

Qualification: \_\_\_\_\_

Designation: \_\_\_\_\_

Speciality: \_\_\_\_\_

System of medicine: \_\_\_\_\_

Phone-Nr.: \_\_\_\_\_

Email-ID: \_\_\_\_\_

| Facility infrastructure |                                                                                                                                                                                                                                                                              |                                                                                                                                                                                                                                                                                                                                                                                                                                                                                                                                                                                                                                                                                             |
|-------------------------|------------------------------------------------------------------------------------------------------------------------------------------------------------------------------------------------------------------------------------------------------------------------------|---------------------------------------------------------------------------------------------------------------------------------------------------------------------------------------------------------------------------------------------------------------------------------------------------------------------------------------------------------------------------------------------------------------------------------------------------------------------------------------------------------------------------------------------------------------------------------------------------------------------------------------------------------------------------------------------|
| 1                       | Since when is the <b>facility</b> functional?                                                                                                                                                                                                                                | Year: _____ <input type="checkbox"/> <sub>99</sub> don't know                                                                                                                                                                                                                                                                                                                                                                                                                                                                                                                                                                                                                               |
| 2                       | Does the facility have a functioning <b>phone</b> (landline or cell phone) at all times?                                                                                                                                                                                     | <input type="checkbox"/> <sub>1</sub> yes<br><input type="checkbox"/> <sub>2</sub> no                                                                                                                                                                                                                                                                                                                                                                                                                                                                                                                                                                                                       |
| 3                       | a) Does the facility have <b>electricity</b> at all times?<br>b) Do you have a generator backup?                                                                                                                                                                             | <input type="checkbox"/> <sub>1</sub> yes ( <i>go to 3b</i> ) <input type="checkbox"/> <sub>2</sub> no ( <i>go to 4</i> )<br><input type="checkbox"/> <sub>1</sub> yes <input type="checkbox"/> <sub>2</sub> no                                                                                                                                                                                                                                                                                                                                                                                                                                                                             |
| 4                       | Does the facility have a functioning <b>computer</b> ?                                                                                                                                                                                                                       | <input type="checkbox"/> <sub>1</sub> yes <input type="checkbox"/> <sub>2</sub> no                                                                                                                                                                                                                                                                                                                                                                                                                                                                                                                                                                                                          |
| 5                       | Is there access to <b>internet</b> within the facility today?                                                                                                                                                                                                                | <input type="checkbox"/> <sub>1</sub> yes <input type="checkbox"/> <sub>2</sub> no                                                                                                                                                                                                                                                                                                                                                                                                                                                                                                                                                                                                          |
| 6                       | Do you maintain <b>patient registers or record files</b> at the facility?                                                                                                                                                                                                    | <input type="checkbox"/> <sub>1</sub> yes, always <input type="checkbox"/> <sub>2</sub> yes, sometimes<br><input type="checkbox"/> <sub>3</sub> no ( <i>go to 16d</i> ) <input type="checkbox"/> <sub>98</sub> no answer                                                                                                                                                                                                                                                                                                                                                                                                                                                                    |
|                         | a) If <b>yes</b> , what format?<br>( <i>check where applicable</i> )                                                                                                                                                                                                         | <input type="checkbox"/> <sub>1</sub> electronic<br><input type="checkbox"/> <sub>2</sub> paper<br><input type="checkbox"/> <sub>3</sub> electronic and paper                                                                                                                                                                                                                                                                                                                                                                                                                                                                                                                               |
|                         | b) Which patient data do you collect on a routine basis?<br>( <i>check where applicable</i> )                                                                                                                                                                                | <input type="checkbox"/> <sub>1</sub> name <input type="checkbox"/> <sub>2</sub> address<br><input type="checkbox"/> <sub>3</sub> age <input type="checkbox"/> <sub>4</sub> gender<br><input type="checkbox"/> <sub>5</sub> occupation <input type="checkbox"/> <sub>6</sub> weight<br><input type="checkbox"/> <sub>7</sub> height <input type="checkbox"/> <sub>8</sub> case number<br><input type="checkbox"/> <sub>9</sub> prescription <input type="checkbox"/> <sub>10</sub> referral<br><input type="checkbox"/> <sub>11</sub> diagnosis <input type="checkbox"/> <sub>12</sub> test results<br><input type="checkbox"/> <sub>97</sub> other ( <i>pls. specify</i> ): _____<br>_____ |
|                         | c) For how many years does this register contain data?                                                                                                                                                                                                                       | _____ ( <i>number of years</i> )                                                                                                                                                                                                                                                                                                                                                                                                                                                                                                                                                                                                                                                            |
|                         | d) If <b>no</b> : What are the main reasons? ( <i>don't read out</i> )<br>( <i>check where applicable</i> )                                                                                                                                                                  | <input type="checkbox"/> <sub>1</sub> lack of time<br><input type="checkbox"/> <sub>2</sub> not significant<br><input type="checkbox"/> <sub>3</sub> not mandatory<br><input type="checkbox"/> <sub>4</sub> lack of infrastructure<br><input type="checkbox"/> <sub>97</sub> other: _____<br><input type="checkbox"/> <sub>98</sub> no answer <input type="checkbox"/> <sub>96</sub> not applicable                                                                                                                                                                                                                                                                                         |
| 7                       | a) Does this facility have a receptionist?                                                                                                                                                                                                                                   | <input type="checkbox"/> <sub>1</sub> yes <input type="checkbox"/> <sub>2</sub> no                                                                                                                                                                                                                                                                                                                                                                                                                                                                                                                                                                                                          |
|                         | b) Does this facility have paramedic or any other staff?                                                                                                                                                                                                                     | <input type="checkbox"/> <sub>1</sub> yes <input type="checkbox"/> <sub>2</sub> no<br><input type="checkbox"/> <sub>97</sub> other staff: _____                                                                                                                                                                                                                                                                                                                                                                                                                                                                                                                                             |
|                         | c) For polyclinics/nursing homes/hospitals:<br>How many general practitioners and specialists are working in this facility?                                                                                                                                                  | <input type="checkbox"/> <sub>1</sub> no. of GPs: _____<br><input type="checkbox"/> <sub>2</sub> no. of specialists: _____<br><input type="checkbox"/> <sub>99</sub> don't know <input type="checkbox"/> <sub>96</sub> not applicable                                                                                                                                                                                                                                                                                                                                                                                                                                                       |
| 8                       | What is the average <b>number of patients</b> you see per day?                                                                                                                                                                                                               | _____ <input type="checkbox"/> <sub>99</sub> don't know                                                                                                                                                                                                                                                                                                                                                                                                                                                                                                                                                                                                                                     |
| 9                       | From which <b>areas</b> do the majority of your patients come from?<br><input type="checkbox"/> <sub>1</sub> this ward ( <i>specify area</i> ): _____<br><input type="checkbox"/> <sub>2</sub> other wards/areas: _____<br><input type="checkbox"/> <sub>98</sub> don't know |                                                                                                                                                                                                                                                                                                                                                                                                                                                                                                                                                                                                                                                                                             |
| 10                      | According to you, what is the <b>socioeconomic background</b> of majority of the patients?                                                                                                                                                                                   | <input type="checkbox"/> <sub>1</sub> below poverty line (BPL)<br><input type="checkbox"/> <sub>2</sub> lower middle class<br><input type="checkbox"/> <sub>3</sub> middle class<br><input type="checkbox"/> <sub>4</sub> upper middle class<br><input type="checkbox"/> <sub>5</sub> upper class<br><input type="checkbox"/> <sub>99</sub> don't know                                                                                                                                                                                                                                                                                                                                      |
| 11                      | Does the facility <b>admit patients overnight</b> ?                                                                                                                                                                                                                          | <input type="checkbox"/> <sub>1</sub> yes: how many beds? _____<br><input type="checkbox"/> <sub>2</sub> no                                                                                                                                                                                                                                                                                                                                                                                                                                                                                                                                                                                 |

| Diagnostics and referrals |                                                                                                                                                                                                                                                                                                                                                                                                                                                                                                                                                                                                                                                                                                                                                                                                                                                                                                                                                                                                                                                                                                                                                                                                                                                                                                                                                                                                                                                                                                                                                                                                                                                                                                                                                                                                                                                                                                                                                                                                                                                                              |                                                                                                                                                                                                                                                                                                                                                   |
|---------------------------|------------------------------------------------------------------------------------------------------------------------------------------------------------------------------------------------------------------------------------------------------------------------------------------------------------------------------------------------------------------------------------------------------------------------------------------------------------------------------------------------------------------------------------------------------------------------------------------------------------------------------------------------------------------------------------------------------------------------------------------------------------------------------------------------------------------------------------------------------------------------------------------------------------------------------------------------------------------------------------------------------------------------------------------------------------------------------------------------------------------------------------------------------------------------------------------------------------------------------------------------------------------------------------------------------------------------------------------------------------------------------------------------------------------------------------------------------------------------------------------------------------------------------------------------------------------------------------------------------------------------------------------------------------------------------------------------------------------------------------------------------------------------------------------------------------------------------------------------------------------------------------------------------------------------------------------------------------------------------------------------------------------------------------------------------------------------------|---------------------------------------------------------------------------------------------------------------------------------------------------------------------------------------------------------------------------------------------------------------------------------------------------------------------------------------------------|
| 12                        | Does this facility <b>diagnose</b> and/or refer the following diseases?<br><p style="text-align: center;">Diagnosis → (if yes) How are you diagnosing? → Do you treat at your facility or refer?</p> a) Diabetes <input type="checkbox"/> <sub>2</sub> no <input type="checkbox"/> <sub>1</sub> yes <input type="checkbox"/> <sub>3</sub> clinical symptoms <input type="checkbox"/> <sub>4</sub> lab-confirmed <input type="checkbox"/> <sub>6</sub> treat <input type="checkbox"/> <sub>5</sub> refer<br>b) BP/Cardiovascular diseases <input type="checkbox"/> <sub>2</sub> no <input type="checkbox"/> <sub>1</sub> yes <input type="checkbox"/> <sub>3</sub> clinical symptoms <input type="checkbox"/> <sub>4</sub> lab-confirmed <input type="checkbox"/> <sub>6</sub> treat <input type="checkbox"/> <sub>5</sub> refer<br>c) Chronic respiratory diseases <input type="checkbox"/> <sub>2</sub> no <input type="checkbox"/> <sub>1</sub> yes <input type="checkbox"/> <sub>3</sub> clinical symptoms <input type="checkbox"/> <sub>4</sub> lab-confirmed <input type="checkbox"/> <sub>6</sub> treat <input type="checkbox"/> <sub>5</sub> refer<br>d) Cancers <input type="checkbox"/> <sub>2</sub> no <input type="checkbox"/> <sub>1</sub> yes <input type="checkbox"/> <sub>3</sub> clinical symptoms <input type="checkbox"/> <sub>4</sub> lab-confirmed <input type="checkbox"/> <sub>6</sub> treat <input type="checkbox"/> <sub>5</sub> refer<br>e) Tuberculosis <input type="checkbox"/> <sub>2</sub> no <input type="checkbox"/> <sub>1</sub> yes <input type="checkbox"/> <sub>3</sub> clinical symptoms <input type="checkbox"/> <sub>4</sub> lab-confirmed <input type="checkbox"/> <sub>6</sub> treat <input type="checkbox"/> <sub>5</sub> refer<br>f) Dengue <input type="checkbox"/> <sub>2</sub> no <input type="checkbox"/> <sub>1</sub> yes <input type="checkbox"/> <sub>3</sub> clinical symptoms <input type="checkbox"/> <sub>4</sub> lab-confirmed <input type="checkbox"/> <sub>6</sub> treat <input type="checkbox"/> <sub>5</sub> refer |                                                                                                                                                                                                                                                                                                                                                   |
| 13                        | a) Does this facility provide in-house investigations? ( <i>check where applicable</i> )                                                                                                                                                                                                                                                                                                                                                                                                                                                                                                                                                                                                                                                                                                                                                                                                                                                                                                                                                                                                                                                                                                                                                                                                                                                                                                                                                                                                                                                                                                                                                                                                                                                                                                                                                                                                                                                                                                                                                                                     | <input type="checkbox"/> <sub>1</sub> X-ray <input type="checkbox"/> <sub>2</sub> ECG<br><input type="checkbox"/> <sub>3</sub> USG <input type="checkbox"/> <sub>4</sub> laboratory<br><input type="checkbox"/> <sub>5</sub> spirometry <input type="checkbox"/> <sub>6</sub> rapid diagnostic test<br><input type="checkbox"/> <sub>7</sub> none |

| Disease Surveillance |                                                                                                                                                                                                                                                                                                                                                                                                                                                                                                                                                                                                              |                                                                                                                                                                                                                                                                                                                                                                                    |
|----------------------|--------------------------------------------------------------------------------------------------------------------------------------------------------------------------------------------------------------------------------------------------------------------------------------------------------------------------------------------------------------------------------------------------------------------------------------------------------------------------------------------------------------------------------------------------------------------------------------------------------------|------------------------------------------------------------------------------------------------------------------------------------------------------------------------------------------------------------------------------------------------------------------------------------------------------------------------------------------------------------------------------------|
| 14                   | Are you aware of disease surveillance?                                                                                                                                                                                                                                                                                                                                                                                                                                                                                                                                                                       | <input type="checkbox"/> <sub>1</sub> yes <input type="checkbox"/> <sub>2</sub> no ( <i>go to 16</i> ) <input type="checkbox"/> <sub>3</sub> undecided                                                                                                                                                                                                                             |
| 15                   | How would you describe the <b>main functions of a disease surveillance</b> system? ( <i>don't read out</i> )<br><input type="checkbox"/> <sub>1</sub> systematic <b>collection</b> of disease information<br><input type="checkbox"/> <sub>2</sub> <b>dissemination</b> to allow action (outbreak)<br><input type="checkbox"/> <sub>3</sub> <b>application</b> of collected data for disease prevention & control<br><input type="checkbox"/> <sub>4</sub> <b>analysis</b> of disease information<br><input type="checkbox"/> <sub>5</sub> other: _____<br><input type="checkbox"/> <sub>98</sub> don't know |                                                                                                                                                                                                                                                                                                                                                                                    |
| 16                   | Do you agree that <b>diseases surveillance</b> is important to improve urban health? ( <i>pls. add comments below</i> )<br>.....<br>.....<br>.....                                                                                                                                                                                                                                                                                                                                                                                                                                                           | <input type="checkbox"/> <sub>1</sub> yes <input type="checkbox"/> <sub>2</sub> no<br><input type="checkbox"/> <sub>3</sub> undecided <input type="checkbox"/> <sub>4</sub> no opinion                                                                                                                                                                                             |
| 17                   | Do you agree that the current burden of <b>infectious diseases</b> in Pune is adequately captured?                                                                                                                                                                                                                                                                                                                                                                                                                                                                                                           | <input type="checkbox"/> <sub>1</sub> yes <input type="checkbox"/> <sub>2</sub> no<br><input type="checkbox"/> <sub>3</sub> undecided <input type="checkbox"/> <sub>4</sub> no opinion                                                                                                                                                                                             |
| 18                   | Do you agree that the current burden of <b>non-communicable diseases</b> in Pune is adequately captured?                                                                                                                                                                                                                                                                                                                                                                                                                                                                                                     | <input type="checkbox"/> <sub>1</sub> yes <input type="checkbox"/> <sub>2</sub> no<br><input type="checkbox"/> <sub>3</sub> undecided <input type="checkbox"/> <sub>4</sub> no opinion                                                                                                                                                                                             |
| 19                   | a) Are you aware of any <b>disease surveillance programs</b> in Maharashtra currently requiring reporting from private sector? ( <i>don't read out</i> )                                                                                                                                                                                                                                                                                                                                                                                                                                                     | <input type="checkbox"/> <sub>1</sub> yes ( <i>which?</i> ) <input type="checkbox"/> <sub>2</sub> no<br><input type="checkbox"/> <sub>3</sub> IDSP<br><input type="checkbox"/> <sub>4</sub> NVBDCP (Vector Borne)<br><input type="checkbox"/> <sub>5</sub> RNTCP (TB)<br><input type="checkbox"/> <sub>6</sub> NPEP (Polio)<br><input type="checkbox"/> <sub>97</sub> Other: _____ |
|                      | b) Are you aware of the following disease control programs in your state? ( <i>read those not checked</i> )                                                                                                                                                                                                                                                                                                                                                                                                                                                                                                  | <input type="checkbox"/> <sub>1</sub> Integrated Disease Surveillance Program<br><input type="checkbox"/> <sub>2</sub> Nat. Vector Borne Disease Control Program<br><input type="checkbox"/> <sub>3</sub> Nat. Revised Tuberculosis Control Program<br><input type="checkbox"/> <sub>4</sub> National Polio Eradication Program                                                    |
| 20                   | a) Do you report dengue cases to the PMC?                                                                                                                                                                                                                                                                                                                                                                                                                                                                                                                                                                    | <input type="checkbox"/> <sub>1</sub> yes <input type="checkbox"/> <sub>2</sub> no <input type="checkbox"/> <sub>96</sub> not applicable                                                                                                                                                                                                                                           |
|                      | b) Do you report TB cases to the PMC?                                                                                                                                                                                                                                                                                                                                                                                                                                                                                                                                                                        | <input type="checkbox"/> <sub>1</sub> yes <input type="checkbox"/> <sub>2</sub> no <input type="checkbox"/> <sub>96</sub> not applicable                                                                                                                                                                                                                                           |

|                                                                                                                                                                                                                                                                                                               |                                                                                                                                                                              |                                                                                                                                                                                                                                                                                                                                                                                                                                                                          |
|---------------------------------------------------------------------------------------------------------------------------------------------------------------------------------------------------------------------------------------------------------------------------------------------------------------|------------------------------------------------------------------------------------------------------------------------------------------------------------------------------|--------------------------------------------------------------------------------------------------------------------------------------------------------------------------------------------------------------------------------------------------------------------------------------------------------------------------------------------------------------------------------------------------------------------------------------------------------------------------|
| 21                                                                                                                                                                                                                                                                                                            | In your opinion, is the involvement of <b>private practitioners</b> in disease surveillance necessary to improve urban health?                                               | <input type="checkbox"/> <sub>1</sub> yes <input type="checkbox"/> <sub>2</sub> no<br><input type="checkbox"/> <sub>3</sub> undecided <input type="checkbox"/> <sub>4</sub> no opinion                                                                                                                                                                                                                                                                                   |
| 22                                                                                                                                                                                                                                                                                                            | Have you been <b>approached by any disease surveillance program</b> to participate in regular surveillance in the last one year?                                             | <input type="checkbox"/> <sub>1</sub> yes<br><input type="checkbox"/> <sub>2</sub> no ( <i>go to 23</i> )<br><input type="checkbox"/> <sub>98</sub> no answer                                                                                                                                                                                                                                                                                                            |
|                                                                                                                                                                                                                                                                                                               | a) If yes, which program?                                                                                                                                                    | _____                                                                                                                                                                                                                                                                                                                                                                                                                                                                    |
|                                                                                                                                                                                                                                                                                                               | b) Did you accept to be part?<br>.....<br>.....                                                                                                                              | <input type="checkbox"/> <sub>1</sub> yes<br><input type="checkbox"/> <sub>2</sub> no<br><input type="checkbox"/> <sub>98</sub> no answer                                                                                                                                                                                                                                                                                                                                |
| 23                                                                                                                                                                                                                                                                                                            | In general, would you be willing to <b>participate</b> in a routine sentinel surveillance system on a continuous basis?                                                      | <input type="checkbox"/> <sub>1</sub> yes <input type="checkbox"/> <sub>2</sub> no <input type="checkbox"/> <sub>3</sub> undecided                                                                                                                                                                                                                                                                                                                                       |
| 24                                                                                                                                                                                                                                                                                                            | In your opinion, which <b>non-communicable diseases</b> should ideally be included in such a system? ( <i>don't read out</i> )                                               | <input type="checkbox"/> <sub>1</sub> cardiovascular diseases<br><input type="checkbox"/> <sub>2</sub> cancers<br><input type="checkbox"/> <sub>3</sub> chronic respiratory diseases<br><input type="checkbox"/> <sub>4</sub> injuries<br><input type="checkbox"/> <sub>5</sub> mental health<br><input type="checkbox"/> <sub>6</sub> metabolic diseases/diabetes<br><input type="checkbox"/> <sub>7</sub> none<br><input type="checkbox"/> <sub>97</sub> others: _____ |
| <i>As part of the project a pilot study will be conducted in three areas of Pune city. Data on selected diseases will be collected from private practitioners over a period of 12 months. The participation in the pilot will be entirely voluntary and can be terminated at any time during the process.</i> |                                                                                                                                                                              |                                                                                                                                                                                                                                                                                                                                                                                                                                                                          |
| 25                                                                                                                                                                                                                                                                                                            | Would you be <b>interested to participate</b> in our pilot study?                                                                                                            | <input type="checkbox"/> <sub>1</sub> yes ( <i>go to 25 b/c</i> )<br><input type="checkbox"/> <sub>2</sub> no ( <i>go to 25a, skip 26/27/28</i> )<br><input type="checkbox"/> <sub>3</sub> undecided ( <i>go to 25a</i> )                                                                                                                                                                                                                                                |
|                                                                                                                                                                                                                                                                                                               | a) If <b>no</b> , could you state some of the main reasons why you hesitate?<br>.....<br>.....                                                                               |                                                                                                                                                                                                                                                                                                                                                                                                                                                                          |
|                                                                                                                                                                                                                                                                                                               | b) If <b>yes</b> , how would you prefer to submit data?                                                                                                                      | <input type="checkbox"/> <sub>1</sub> paper based <input type="checkbox"/> <sub>99</sub> don't know<br><input type="checkbox"/> <sub>2</sub> electronically (Email)                                                                                                                                                                                                                                                                                                      |
|                                                                                                                                                                                                                                                                                                               | c) How frequent should such data be collected?                                                                                                                               | <input type="checkbox"/> <sub>1</sub> weekly <input type="checkbox"/> <sub>2</sub> bi-weekly<br><input type="checkbox"/> <sub>3</sub> monthly <input type="checkbox"/> <sub>99</sub> don't know                                                                                                                                                                                                                                                                          |
| 26                                                                                                                                                                                                                                                                                                            | In your opinion is it feasible to collect the following <b>spatial and socioeconomic data</b> in regular sentinel surveillance system from private practitioners?            |                                                                                                                                                                                                                                                                                                                                                                                                                                                                          |
|                                                                                                                                                                                                                                                                                                               | a) age <input type="checkbox"/> <sub>1</sub> yes <input type="checkbox"/> <sub>2</sub> no <input type="checkbox"/> <sub>99</sub> don't know                                  |                                                                                                                                                                                                                                                                                                                                                                                                                                                                          |
|                                                                                                                                                                                                                                                                                                               | b) gender <input type="checkbox"/> <sub>1</sub> yes <input type="checkbox"/> <sub>2</sub> no <input type="checkbox"/> <sub>99</sub> don't know                               |                                                                                                                                                                                                                                                                                                                                                                                                                                                                          |
|                                                                                                                                                                                                                                                                                                               | c) address (sub ward level or pin code) <input type="checkbox"/> <sub>1</sub> yes <input type="checkbox"/> <sub>2</sub> no <input type="checkbox"/> <sub>99</sub> don't know |                                                                                                                                                                                                                                                                                                                                                                                                                                                                          |
|                                                                                                                                                                                                                                                                                                               | d) highest educational degree <input type="checkbox"/> <sub>1</sub> yes <input type="checkbox"/> <sub>2</sub> no <input type="checkbox"/> <sub>99</sub> don't know           |                                                                                                                                                                                                                                                                                                                                                                                                                                                                          |
|                                                                                                                                                                                                                                                                                                               | e) occupation <input type="checkbox"/> <sub>1</sub> yes <input type="checkbox"/> <sub>2</sub> no <input type="checkbox"/> <sub>99</sub> don't know                           |                                                                                                                                                                                                                                                                                                                                                                                                                                                                          |
|                                                                                                                                                                                                                                                                                                               | f) income (broad categories) <input type="checkbox"/> <sub>1</sub> yes <input type="checkbox"/> <sub>2</sub> no <input type="checkbox"/> <sub>99</sub> don't know            |                                                                                                                                                                                                                                                                                                                                                                                                                                                                          |
|                                                                                                                                                                                                                                                                                                               | g) BPL status <input type="checkbox"/> <sub>1</sub> yes <input type="checkbox"/> <sub>2</sub> no <input type="checkbox"/> <sub>99</sub> don't know                           |                                                                                                                                                                                                                                                                                                                                                                                                                                                                          |
|                                                                                                                                                                                                                                                                                                               | h) residency: slum/non-slum <input type="checkbox"/> <sub>1</sub> yes <input type="checkbox"/> <sub>2</sub> no <input type="checkbox"/> <sub>99</sub> don't know             |                                                                                                                                                                                                                                                                                                                                                                                                                                                                          |
| 27                                                                                                                                                                                                                                                                                                            | What <b>incentives</b> could be given to improve private practitioner participation in routine surveillance?<br>.....<br>.....<br>.....                                      |                                                                                                                                                                                                                                                                                                                                                                                                                                                                          |
| 28                                                                                                                                                                                                                                                                                                            | What main <b>barriers</b> should be eliminated to facilitate private practitioner participation?<br>.....<br>.....<br>.....                                                  |                                                                                                                                                                                                                                                                                                                                                                                                                                                                          |

**Interviewer observations:**

**Interviewee Comments:**
